# Supplementary material for: Mortality Trend of Severe COVID-19 in Under-Vaccinated Population Admitted to ICU in French Amazonia
Source: MDPI journal article supplement (doi:10.3390/tropicalmed9010015), 2024-01-05
Supplement: s1 [file s1]

## Supplemental digital content

### Mortality trend of severe COVID-19 in under-vaccinated population admitted to ICU in French Amazonia.

#### Table of contents:

|                                                                                                                     |   |
|---------------------------------------------------------------------------------------------------------------------|---|
| <b>Table S1:</b> This is a table. Epidemiologic characteristics and management according to the study periods ..... | 2 |
| <b>Table S2:</b> This is a table. Comparison of survivors and non-survivors at hospital discharge .....             | 5 |
| <b>Table S3:</b> This is a table. Outcome of patients according to the study periods.....                           | 7 |

**Table S1: This is a table. Epidemiologic characteristics and management according to the study periods**

|                                      | Total population |              | Period 1 |              | Period 2 |              |       | Period 3 |              |                |
|--------------------------------------|------------------|--------------|----------|--------------|----------|--------------|-------|----------|--------------|----------------|
| Parameter                            | Nb               | Result       | Nb       | Result       | Nb       | Result       | p*    | Nb       | Result       | p <sup>s</sup> |
| Age (years)                          | 383              | 63 (54 - 71) | 110      | 64 (52 - 70) | 161      | 62 (54 - 71) | 0.890 | 104      | 65 (55 - 72) | 0.368          |
| Male gender                          | 383              | 208 (54.3%)  | 110      | 72 (65.5%)   | 161      | 86 (53.4%)   | 0.048 | 104      | 45 (43.3%)   | 0.001          |
| BMI (Kg/m <sup>2</sup> )             | 345              | 30 (27 - 35) | 100      | 30 (27 - 33) | 144      | 30 (26 - 35) | 0.265 | 93       | 30 (27 - 34) | 0.191          |
| Frailty                              | 383              | 42 (11%)     | 110      | 8 (7.3%)     | 161      | 21 (13%)     | 0.131 | 104      | 12 (11.5%)   | 0.284          |
| Simplified Acute Physiology Score    | 381              | 29 (24 - 37) | 110      | 32 (26 - 42) | 160      | 29 (23 - 35) | 0.009 | 103      | 30 (24 - 37) | 0.103          |
| <b>Comorbidities</b>                 |                  |              |          |              |          |              |       |          |              |                |
| Diabetes mellitus                    | 383              | 162 (42.3%)  | 110      | 58 (52.7%)   | 161      | 61 (37.9%)   | 0.016 | 104      | 41 (39.4%)   | 0.051          |
| Hypertension                         | 383              | 235 (61.4%)  | 110      | 67 (60.9%)   | 161      | 88 (54.7%)   | 0.307 | 104      | 75 (72.1%)   | 0.083          |
| Chronic respiratory failure          | 383              | 28 (7.3%)    | 110      | 8 (7.3%)     | 161      | 15 (9.3%)    | 0.553 | 104      | 4 (3.8%)     | 0.276          |
| Chronic renal failure                | 383              | 42 (11%)     | 110      | 16 (14.5%)   | 161      | 11 (6.8%)    | 0.037 | 104      | 14 (13.5%)   | 0.819          |
| Dialysis                             | 383              | 14 (3.7%)    | 110      | 8 (7.3%)     | 161      | 4 (2.5%)     | 0.060 | 104      | 2 (1.9%)     | 0.064          |
| Renal transplantation                | 383              | 4 (1%)       | 110      | 3 (2.7%)     | 161      | 0 (0%)       | 0.035 | 104      | 1 (1%)       | 0.340          |
| Cardiac failure                      | 383              | 31 (8.1%)    | 110      | 12 (10.9%)   | 161      | 13 (8.1%)    | 0.428 | 104      | 6 (5.8%)     | 0.176          |
| Obesity                              | 383              | 188 (49.1%)  | 110      | 50 (45.5%)   | 161      | 85 (52.8%)   | 0.235 | 104      | 49 (47.1%)   | 0.808          |
| Pregnancy (within women)             | 175              | 19 (10.9%)   | 38       | 5 (13.2%)    | 75       | 8 (10.7%)    | 0.695 | 59       | 6 (10.2%)    | 0.650          |
| Gestational age (weeks of gestation) | 18               | 30 (28 - 37) | 5        | 28 (28 - 35) | 7        | 29 (28 - 35) | 0.934 | 6        | 34 (29 - 38) | 0.518          |
| Sickle cell disease                  | 383              | 5 (1.3%)     | 110      | 0 (0%)       | 161      | 3 (1.9%)     | 0.150 | 104      | 2 (1.9%)     | 0.144          |
| Malignancy                           | 383              | 12 (3.1%)    | 110      | 3 (2.7%)     | 161      | 3 (1.9%)     | 0.635 | 104      | 4 (3.8%)     | 0.646          |
| Immunosuppression                    | 383              | 28 (7.3%)    | 110      | 8 (7.3%)     | 161      | 7 (4.3%)     | 0.301 | 104      | 11 (10.6%)   | 0.396          |

**Table S1:** This is a table. Epidemiologic characteristics and management according to the study periods (Follow)

|                                                        |            |                    |            |                   |            |                    |              |            |                   |              |
|--------------------------------------------------------|------------|--------------------|------------|-------------------|------------|--------------------|--------------|------------|-------------------|--------------|
| <b>Time to hospitalization and ICU admission</b>       |            |                    |            |                   |            |                    |              |            |                   |              |
| Time between first symptoms and hospitalization (days) | 364        | 7 (4 - 9)          | 106        | 6 (3 - 8)         | 151        | 7 (4 - 9)          | 0.062        | 99         | 7 (5 - 9)         | 0.015        |
| Time between Hospitalization and ICU admission (days)  | 383        | 1 (0 - 4)          | 110        | 1 (0 - 4)         | 161        | 1 (0 - 4)          | 0.426        | 104        | 2 (0 - 3)         | 0.956        |
| <b>Clinical manifestations</b>                         |            |                    |            |                   |            |                    |              |            |                   |              |
| Number of organ failure                                | 383        | 1 (1 - 1)          | 110        | 1 (1 - 2)         | 161        | 1 (1 - 1)          | 0.553        | 104        | 1 (1 - 1)         | 0.413        |
| Hemodynamic failure                                    | 383        | 24 (6.3%)          | 110        | 12 (10.9%)        | 161        | 8 (5%)             | 0.066        | 104        | 4 (3.8%)          | 0.050        |
| Respiratory failure                                    | 383        | 383 (100%)         | 110        | 110 (100%)        | 161        | 161 (100%)         | -            | 104        | 104 (100%)        | -            |
| Neurologic failure                                     | 383        | 25 (6.5%)          | 110        | 6 (5.5%)          | 161        | 11 (6.8%)          | 0.646        | 104        | 7 (6.7%)          | 0.676        |
| Hematologic failure                                    | 383        | 7 (1.8%)           | 110        | 3 (2.7%)          | 161        | 0 (0%)             | 0.035        | 104        | 3 (2.9%)          | 0.944        |
| Renal failure                                          | 383        | 70 (18.3%)         | 110        | 22 (20%)          | 161        | 27 (16.8%)         | 0.498        | 104        | 15 (14.4%)        | 0.281        |
| Liver failure                                          | 383        | 10 (2.6%)          | 110        | 2 (1.8%)          | 161        | 4 (2.5%)           | 0.714        | 104        | 2 (1.9%)          | 0.955        |
| Infection at admission                                 | 383        | 8 (2.1%)           | 110        | 2 (1.8%)          | 161        | 3 (1.9%)           | 0.978        | 104        | 3 (2.9%)          | 0.606        |
| <b>Chest Computed-Tomography</b>                       | <b>383</b> | <b>347 (90.6%)</b> | <b>110</b> | <b>92 (83.6%)</b> | <b>161</b> | <b>150 (93.2%)</b> | <b>0.013</b> | <b>104</b> | <b>97 (93.3%)</b> | <b>0.028</b> |
| Alveolar condensations                                 | 347        | 120 (34.6%)        | 92         | 17 (18.5%)        | 150        | 78 (52%)           | 0.000        | 97         | 21 (21.6%)        | 0.587        |
| Interstitial infiltrates                               | 347        | 331 (95.4%)        | 92         | 91 (98.9%)        | 150        | 140 (93.3%)        | 0.043        | 97         | 92 (94.8%)        | 0.111        |
| Pleural effusion                                       | 347        | 29 (8.4%)          | 92         | 6 (6.5%)          | 150        | 16 (10.7%)         | 0.276        | 97         | 6 (6.2%)          | 0.925        |
| Posterior condensations                                | 347        | 181 (52.2%)        | 92         | 28 (30.4%)        | 150        | 95 (63.3%)         | 0.000        | 97         | 55 (56.7%)        | 0.000        |
| Contrast agent administration                          | 347        | 267 (76.9%)        | 92         | 87 (94.6%)        | 150        | 119 (79.3%)        | 0.001        | 97         | 53 (54.6%)        | 0.000        |
| Pulmonary embolism                                     | 267        | 34 (12.7%)         | 87         | 9 (10.3%)         | 119        | 12 (10.1%)         | 0.951        | 53         | 11 (20.8%)        | 0.088        |
| Percentage of lesion                                   | 341        | 70 (50 - 75)       | 89         | 70 (50 - 75)      | 149        | 75 (50 - 75)       | 0.922        | 97         | 50 (50 - 75)      | 0.068        |

**Table S1:** This is a table. Epidemiologic characteristics and management according to the study periods (Follow)

|                                                           |            |                    |            |                   |            |                   |              |            |                   |              |
|-----------------------------------------------------------|------------|--------------------|------------|-------------------|------------|-------------------|--------------|------------|-------------------|--------------|
| <b>Respiratory support at ICU admission</b>               |            |                    |            |                   |            |                   |              |            |                   |              |
| High-flow nasal cannula oxygen                            | 383        | 281 (73.4%)        | 110        | 69 (62.7%)        | 161        | 118 (73.3%)       | 0.065        | 104        | 88 (84.6%)        | 0.000        |
| Non-invasive mechanical ventilation                       | 383        | 108 (28.2%)        | 110        | 10 (9.1%)         | 161        | 45 (28%)          | 0.000        | 104        | 51 (49%)          | 0.000        |
| Invasive mechanical ventilation                           | 383        | 96 (25.1%)         | 110        | 39 (35.5%)        | 161        | 41 (25.5%)        | 0.077        | 104        | 14 (13.5%)        | 0.000        |
| <b>Maximal respiratory support during hospitalization</b> |            |                    |            |                   |            |                   |              |            |                   |              |
| High-flow nasal cannula oxygen                            | 383        | 138 (36%)          | 110        | 39 (35.5%)        | 161        | 61 (37.9%)        | 0.683        | 104        | 34 (32.7%)        | 0.670        |
| HFNCO duration (days)                                     | 125        | 6 (4 - 8)          | 33         | 6 (5 - 10)        | 60         | 5 (3 - 7)         | 0.015        | 30         | 6 (4 - 9)         | 0.556        |
| Non-invasive mechanical ventilation                       | 383        | 60 (15.7%)         | 110        | 4 (3.6%)          | 161        | 30 (18.6%)        | 0.000        | 104        | 24 (23.1%)        | 0.000        |
| Invasive mechanical ventilation                           | 383        | 185 (48.3%)        | 110        | 67 (60.9%)        | 161        | 70 (43.5%)        | 0.005        | 104        | 46 (44.2%)        | 0.015        |
| Time from ICU admission to MV (days)                      | 185        | 2 (0 - 5)          | 67         | 1 (0 - 5)         | 70         | 1 (0 - 4)         | 0.802        | 46         | 4 (1 - 5)         | 0.034        |
| MV duration (days)                                        | 185        | 13 (6 - 22)        | 67         | 15 (8 - 28)       | 70         | 13 (7 - 19)       | 0.175        | 46         | 8 (4 - 19)        | 0.029        |
| <b>Antibiotics before mechanical ventilation</b>          | <b>185</b> | <b>89 (48.1%)</b>  | <b>67</b>  | <b>35 (52.2%)</b> | <b>70</b>  | <b>37 (52.9%)</b> | <b>0.942</b> | <b>46</b>  | <b>15 (32.6%)</b> | <b>0.039</b> |
| <b>Catecholamines</b>                                     | <b>383</b> | <b>145 (37.9%)</b> | <b>110</b> | <b>46 (41.8%)</b> | <b>161</b> | <b>57 (35.4%)</b> | <b>0.285</b> | <b>104</b> | <b>41 (39.4%)</b> | <b>0.721</b> |
| Time from ICU admission to catecholamines                 | 145        | 2 (0 - 7)          | 46         | 1 (0 - 9)         | 57         | 2 (0 - 6)         | 0.872        | 41         | 4 (1 - 6)         | 0.249        |
| Catecholamines duration (days)                            | 145        | 8 (3 - 17)         | 46         | 15 (4 - 25)       | 57         | 7 (3 - 13)        | 0.014        | 41         | 5 (2 - 12)        | 0.003        |
| <b>Renal replacement therapy</b>                          | <b>383</b> | <b>59 (15.4%)</b>  | <b>110</b> | <b>26 (23.6%)</b> | <b>161</b> | <b>21 (13%)</b>   | <b>0.024</b> | <b>104</b> | <b>11 (10.6%)</b> | <b>0.012</b> |
| Time from ICU admission to RRT                            | 59         | 6 (1 - 14)         | 26         | 5 (0 - 14)        | 21         | 7 (3 - 15)        | 0.327        | 11         | 6 (2 - 10)        | 0.893        |
| RRT duration (days)                                       | 59         | 10 (6 - 19)        | 26         | 8 (5 - 20)        | 21         | 10 (6 - 13)       | 0.723        | 11         | 14 (7 - 21)       | 0.424        |

Nb: Number of patients in whom the data was recorded, BMI: Body mass index, ICU: Intensive care unit, HFNCO: High Flow Nasal Cannula Oxygen, NIV: Non-Invasive Ventilation, MV: Invasive Mechanical Ventilation, RRT: Renal replacement therapy, \*Period 2 vs. period 1, \$period 3 vs. period 1

**Table S2: This is a table. Comparison of survivors and non-survivors at hospital discharge**

| Parameter                                        | Non-survivors |                 | Survivors |                   | p     |
|--------------------------------------------------|---------------|-----------------|-----------|-------------------|-------|
|                                                  | N             | Result          | N         | Result            |       |
| Age (years)                                      | 14            | 69 (61 - 75)    | 24        | 60 (47 - 67)      | 0.000 |
| Male gender                                      | 14            | 77 (53.8%)      | 24        | 131 (54.6%)       | 0.889 |
| BMI (Kg/m <sup>2</sup> )                         | 12            | 29 (26 - 35)    | 22        | 30 (27 - 34)      | 0.323 |
| Frailty                                          | 14            | 30 (21%)        | 24        | 12 (5%)           | 0.000 |
| Simplified Acute Physiology Score                | 14            | 35 (29 - 44)    | 23        | 27 (22 - 33)      | 0.000 |
| Occupancy rate during ICU stay (%)               | 14            | 94.6 (80.8-104) | 24        | 93.1 (78.9-103.6) | 0.495 |
| <b>Comorbidities</b>                             |               |                 |           |                   |       |
| Diabetes mellitus                                | 14            | 70 (49%)        | 24        | 92 (38.3%)        | 0.042 |
| Hypertension                                     | 14            | 104 (72.7%)     | 24        | 131 (54.6%)       | 0.000 |
| Chronic respiratory failure                      | 14            | 15 (10.5%)      | 24        | 13 (5.4%)         | 0.065 |
| Chronic renal failure                            | 14            | 23 (16.1%)      | 24        | 19 (7.9%)         | 0.013 |
| Dialysis                                         | 14            | 7 (4.9%)        | 24        | 7 (2.9%)          | 0.318 |
| Renal transplantation                            | 14            | 2 (1.4%)        | 24        | 2 (0.8%)          | 0.599 |
| Cardiac failure                                  | 14            | 15 (10.5%)      | 24        | 16 (6.7%)         | 0.185 |
| Obesity                                          | 14            | 61 (42.7%)      | 24        | 127 (52.9%)       | 0.052 |
| Pregnancy                                        | 66            | 1 (1.5%)        | 10        | 18 (16.5%)        | 0.002 |
| Gestational age (weeks of gestation)             | 1             | 38 (38 - 38)    | 17        | 29 (28 - 35)      | 0.204 |
| Sickle cell disease                              | 14            | 2 (1.4%)        | 24        | 3 (1.3%)          | 0.901 |
| Malignancy                                       | 14            | 8 (5.6%)        | 24        | 4 (1.7%)          | 0.033 |
| Immunosuppression                                | 14            | 16 (11.2%)      | 24        | 12 (5%)           | 0.024 |
| <b>Time to hospitalization and ICU admission</b> |               |                 |           |                   |       |
| Time between symptoms and hospitalization (days) | 13            | 6 (3 - 8)       | 22        | 7 (4 - 9)         | 0.049 |
| Time between hospitalization and ICU admission   | 14            | 1 (0 - 4)       | 24        | 1 (0 - 4)         | 0.532 |
| ICU length of stay (days)                        | 14            | 14 (7 - 23)     | 24        | 9 (6 - 15)        | 0.003 |
| Hospital length of stay (days)                   | 14            | 17 (9 - 27)     | 24        | 18 (13 - 29)      | 0.010 |
| <b>Clinical manifestations</b>                   |               |                 |           |                   |       |
| Number of organ failure                          | 14            | 1 (1 - 2)       | 24        | 1 (1 - 1)         | 0.004 |
| Hemodynamic failure                              | 14            | 15 (10.5%)      | 24        | 9 (3.8%)          | 0.008 |
| Respiratory failure                              | 14            | 143 (100%)      | 24        | 240 (100%)        | -     |
| Neurologic failure                               | 14            | 14 (9.8%)       | 24        | 11 (4.6%)         | 0.046 |
| Hematologic failure                              | 14            | 4 (2.8%)        | 24        | 3 (1.3%)          | 0.274 |
| Renal failure                                    | 14            | 37 (25.9%)      | 24        | 33 (13.8%)        | 0.012 |
| Liver failure                                    | 14            | 4 (2.8%)        | 24        | 6 (2.5%)          | 0.860 |
| Infection at admission                           | 14            | 6 (4.2%)        | 24        | 2 (0.8%)          | 0.026 |

**Table S2:** This is a table. Comparison of survivors and non-survivors at hospital discharge (Follow)

|                                                           |            |                    |            |                    |              |
|-----------------------------------------------------------|------------|--------------------|------------|--------------------|--------------|
| <b>Chest Computed-Tomography</b>                          | <b>143</b> | <b>125 (87.4%)</b> | <b>240</b> | <b>222 (92.5%)</b> | <b>0.099</b> |
| Alveolar condensations                                    | 125        | 44 (35.2%)         | 222        | 76 (34.2%)         | 0.856        |
| Interstitial infiltrates                                  | 125        | 116 (92.8%)        | 222        | 215 (96.8%)        | 0.084        |
| Pleural effusion                                          | 125        | 8 (6.4%)           | 222        | 21 (9.5%)          | 0.323        |
| Posterior condensations                                   | 125        | 71 (56.8%)         | 222        | 110 (49.5%)        | 0.169        |
| Contrast agent administration                             | 125        | 84 (67.2%)         | 222        | 183 (82.4%)        | 0.001        |
| Pulmonary embolism                                        | 84         | 12 (14.3%)         | 183        | 22 (12%)           | 0.606        |
| Percentage of lesion                                      | 124        | 75 (50 - 75)       | 217        | 50 (50 - 75)       | 0.148        |
| <b>Respiratory support at ICU admission</b>               |            |                    |            |                    |              |
| High flow nasal cannula oxygen                            | 143        | 96 (67.1%)         | 240        | 185 (77.1%)        | 0.033        |
| Non-invasive mechanical ventilation                       | 143        | 55 (38.5%)         | 240        | 53 (22.1%)         | 0.001        |
| Invasive mechanical ventilation                           | 143        | 43 (30.1%)         | 240        | 53 (22.1%)         | 0.081        |
| <b>Maximal respiratory support during hospitalization</b> |            |                    |            |                    |              |
| High flow oxygen                                          | 143        | 18 (12.6%)         | 240        | 120 (50%)          | 0.000        |
| HFNCO duration (days)                                     | 14         | 6 (3 - 8)          | 111        | 6 (4 - 8)          | 0.947        |
| Non-invasive mechanical ventilation                       | 143        | 16 (11.2%)         | 240        | 44 (18.3%)         | 0.063        |
| Invasive mechanical ventilation                           | 143        | 109 (76.2%)        | 240        | 76 (31.7%)         | 0.000        |
| Time from ICU admission to MV (days)                      | 109        | 3 (1 - 6)          | 76         | 1 (0 - 3)          | 0.000        |
| MV duration (days)                                        | 109        | 13 (4 - 20)        | 76         | 14 (7 - 25)        | 0.123        |
| <b>Antibiotics before mechanical ventilation</b>          | <b>109</b> | <b>50 (45.9%)</b>  | <b>76</b>  | <b>39 (51.3%)</b>  | <b>0.466</b> |
| <b>Catecholamines</b>                                     | <b>143</b> | <b>96 (67.1%)</b>  | <b>240</b> | <b>49 (20.4%)</b>  | <b>0.000</b> |
| Time from ICU admission to catecholamines (days)          | 96         | 4 (0 - 9)          | 49         | 1 (0 - 3)          | 0.006        |
| Catecholamines duration (days)                            | 96         | 8 (3 - 17)         | 49         | 6 (3 - 16)         | 0.664        |
| <b>Renal replacement therapy</b>                          | <b>143</b> | <b>42 (29.4%)</b>  | <b>240</b> | <b>17 (7.1%)</b>   | <b>0.000</b> |
| Time from ICU admission to RRT                            | 42         | 8 (3 - 15)         | 17         | 1 (0 - 4)          | 0.006        |
| RRT duration (days)                                       | 42         | 10 (4 - 15)        | 17         | 10 (6 - 21)        | 0.327        |
| <b>ICU-AI</b>                                             | <b>143</b> | <b>60 (42%)</b>    | <b>240</b> | <b>37 (15.4%)</b>  | <b>0.000</b> |
| Delay from ICU admission to ICU-AI (days)                 | 60         | 9 (6 - 14)         | 37         | 9 (5 - 12)         | 0.549        |

Nb: Number of patients in whom the data was recorded, HFNCO: High Flow Nasal Cannula Oxygen, NIV: Non-Invasive Ventilation, MV: Invasive Mechanical Ventilation, RRT: Renal replacement therapy, ICU: Intensive care unit, AI: Acquired infection

**Table S3:** This is a table. Outcome of patients according to the study periods

|                                         | Total population |              | Period 1 |              | Period 2 |              |       | Period 3 |              |                |
|-----------------------------------------|------------------|--------------|----------|--------------|----------|--------------|-------|----------|--------------|----------------|
| Parameter                               | Nb               | Result       | Nb       | Result       | Nb       | Result       | p*    | Nb       | Result       | p <sup>s</sup> |
| ICU length of stay (days)               | 383              | 10 (6 - 19)  | 110      | 13 (7 - 27)  | 161      | 9 (5 - 17)   | 0.003 | 104      | 10 (6 - 17)  | 0.027          |
| Hospital length of stay (days)          | 383              | 18 (12 - 29) | 110      | 21 (14 - 34) | 161      | 17 (12 - 27) | 0.027 | 104      | 15 (11 - 23) | 0.001          |
| ICU mortality                           | 383              | 138 (36%)    | 110      | 33 (30%)     | 161      | 55 (34.2%)   | 0.473 | 104      | 49 (47.1%)   | 0.010          |
| Limitation of life-sustaining treatment | 143              | 54 (37.8%)   | 34       | 9 (26.5%)    | 59       | 27 (45.8%)   | 0.066 | 49       | 17 (34.7%)   | 0.427          |
| Not to be intubated order               | 54               | 12 (22.2%)   | 9        | 1 (11.1%)    | 27       | 6 (22.2%)    | 0.652 | 17       | 5 (29.4%)    | 0.380          |
| Mortality at day-30                     | 383              | 115 (30%)    | 110      | 19 (17.3%)   | 161      | 50 (31.1%)   | 0.011 | 104      | 45 (43.3%)   | 0.000          |
| Mortality at day-60                     | 383              | 138 (36%)    | 110      | 32 (29.1%)   | 161      | 58 (36%)     | 0.234 | 104      | 47 (45.2%)   | 0.015          |
| Hospital mortality                      | 383              | 143 (37.3%)  | 110      | 34 (30.9%)   | 161      | 59 (36.6%)   | 0.329 | 104      | 49 (47.1%)   | 0.015          |
| Causes of death :                       |                  |              |          |              |          |              |       |          |              |                |
| Septic shock                            | 143              | 67 (46.9%)   | 34       | 21 (61.8%)   | 59       | 21 (35.6%)   | 0.015 | 49       | 25 (51%)     | 0.333          |
| Severe hypoxemia                        | 143              | 53 (37.1%)   | 34       | 8 (23.5%)    | 59       | 30 (50.8%)   | 0.010 | 49       | 15 (30.6%)   | 0.478          |
| Pulmonary embolism                      | 143              | 11 (7.7%)    | 34       | 4 (11.8%)    | 59       | 2 (3.4%)     | 0.187 | 49       | 5 (10.2%)    | 1              |
| Others                                  | 143              | 12 (8.4%)    | 34       | 1 (2.9%)     | 59       | 6 (10.2%)    | 0.416 | 49       | 4 (8.2%)     | 0.644          |
| ICU-Acquired infection                  | 383              | 97 (25.3%)   | 110      | 34 (30.9%)   | 161      | 36 (22.4%)   | 0.114 | 104      | 27 (26%)     | 0.423          |
| Time from admission to ICU-AI (days)    | 97               | 9 (6 - 14)   | 34       | 12 (8 - 18)  | 36       | 8 (5 - 12)   | 0.006 | 27       | 7 (5 - 14)   | 0.020          |

Nb: Number of patients in whom the data was recorded, ICU: Intensive care unit, AI: Acquired infection

\*Period 2 *vs.* period 1, <sup>s</sup>period 3 *vs.* period 1
